# Supplementary material
Source: PubMed Central journal article supplement (PMC6317891)
Supplement: NIHMS1506142-supplement-1.pdf [file NIHMS1506142-supplement-1.pdf]

**Supplementary Table 1.** Effect of 5B8 vs IgG2b on Maximum Clinical Score in EAE experiments.

| EAE experiment                                    | Maximum Clinical Score |      | P value     | Type of test   | Number of mice                 |
|---------------------------------------------------|------------------------|------|-------------|----------------|--------------------------------|
|                                                   | IgG2b                  | 5B8  |             |                |                                |
| PLP <sub>139-151</sub>                            | 2.45                   | 1.53 | $P = 0.015$ | Welch's t-test | IgG2b (n = 16)<br>5B8 (n = 16) |
| MOG <sub>35-55</sub>                              | 2.58                   | 1.00 | $P = 0.018$ | Welch's t-test | IgG2b (n = 11)<br>5B8 (n = 12) |
| Th1 adoptive EAE                                  | 3.68                   | 2.64 | $P = 0.005$ | Welch's t-test | IgG2b (n = 15)<br>5B8 (n = 24) |
| PLP <sub>139-151</sub><br>(Therapeutic treatment) | 3.375                  | 1.9  | $P = 0.002$ | Welch's t-test | IgG2b (n = 10)<br>5B8 (n = 10) |

Table showing mean maximum clinical score of disease. Statistical analysis was done with two-tailed Welch's t-test.

**Supplementary Table 2.** Effect of 5B8 vs IgG2b on Day of Onset in EAE experiments.

| EAE experiments        | Day of Onset |      | P value     | Type of test  | Number of mice                 |
|------------------------|--------------|------|-------------|---------------|--------------------------------|
|                        | IgG2b        | 5B8  |             |               |                                |
| PLP <sub>139-151</sub> | 13           | 14.5 | $P = 0.005$ | Log-rank test | IgG2b (n = 16)<br>5B8 (n = 16) |
| MOG <sub>35-55</sub>   | 15.5         | 18   | $P = 0.023$ | Log-rank test | IgG2b (n = 11)<br>5B8 (n = 12) |
| Th1 adoptive EAE       | 9            | 11   | $P = 0.014$ | Log-rank test | IgG2b (n = 15)<br>5B8 (n = 24) |

Table showing mean day of onset. Statistical analysis was done with two-tailed Welch's t-test.

**Supplementary Table 3.** Sequence of primers used for RT Quantitative PCR.

| <b>RT QPCR primers</b> | <b>Forward Primer</b>    | <b>Reverse Primer</b>    |
|------------------------|--------------------------|--------------------------|
| Ccl24                  | CTCCTTCTCCTGGTAGCCTGC    | GTGATGAAGATGACCCCTGCCTT  |
| Tnfsf18                | CGAGTCCTGCATGGTTAA       | TCAGCTTCCCATCAGATGTC     |
| IL-12p40               | TCCCCATTCCTACTTCTCCCTC   | GGAACGCACCTTTCTGGTTACA   |
| Cxcl3                  | CATCCAGAGCTTGACGGTGAC    | CTTGCCGCTCTTCAGTATCTTCTT |
| IFN- $\gamma$          | TCAAGTGGCATAGATGTGGAAGAA | TGGCTCTGCAGGATTTTCATG    |
| TNF- $\alpha$          | TCCCAGGTTCTCTTCAAGGGA    | GGTGAGGAGCACGTAGTCGG     |
| IL-1 $\beta$           | GCAACTGTTCTGAACTCAACT    | ATCTTTTGGGGTCCGTCAACT    |
| Cxcl10                 | CCAAGTGCTGCCGTCATTTTC    | GGCTCGCAGGGATGATTTCAA    |
| GAPDH                  | CAAGGCCGAGAATGGGAAG      | GGCCTCACCCCATTTGATGT     |
